# Supplementary material
Source: ML conference proceedings conference paper supplement (https://proceedings.neurips.cc/paper_files/paper/2022/hash/1d1cea122b9ec9f78acc21510659e500-Abstract.html)
Supplement: Supplementary file 1 [file 1d1cea122b9ec9f78acc21510659e500-Supplemental-Conference.zip]

Archive with 1 entries (1 files):
- s-tec_appendix.pdf
